# Supplementary material
Source: Springer Nature journal article supplement (https://springermedizin.de/resource/supplementary/13054_2012_1747_MOESM2_ESM.pdf/9711552)

Panel A

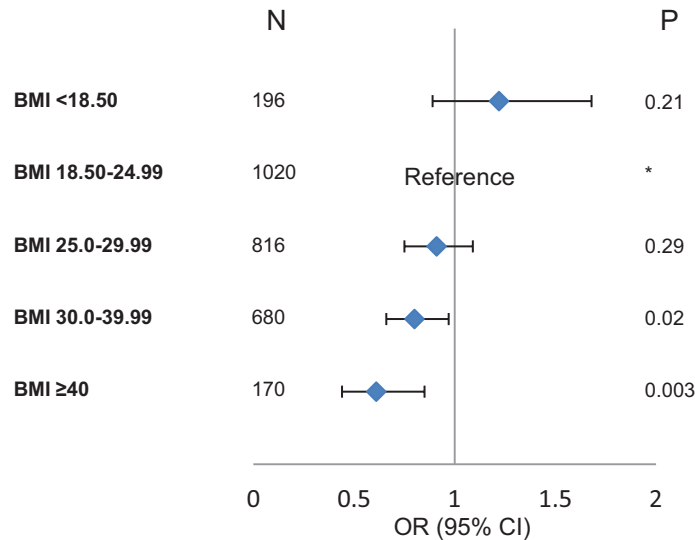

Panel B

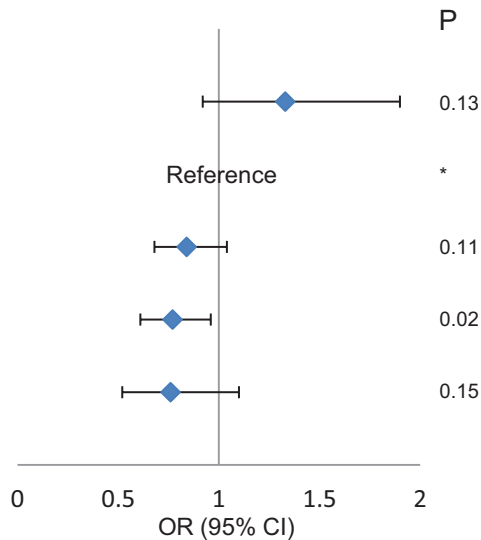

Panel C

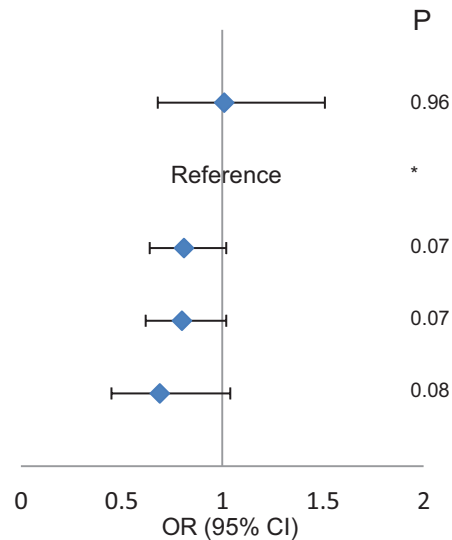

Supplement: MOESM2 [file 9711552]
